# Supplementary material for: Biodiesel Production Catalyzed by Lipase Extract Powder of Leonotis nepetifolia (Christmas Candlestick) Seed
Source: MDPI journal article supplement (doi:10.3390/en16062848), 2023-03-19
Supplement: s1 [file s1]

## Supplementary Material

### “Biodiesel production catalyzed by lipase extract powder of *Leonotis nepetifolia* (Christmas candlestick) seed”

#### Authors

Verónica Ávila Vázquez\*, Miguel Mauricio Aguilera Flores, Luis Felipe Hernández Casas, Nahum Andrés Medellín Castillo, Alejandro Rocha Uribe, Hans Christian Correa Aguado.

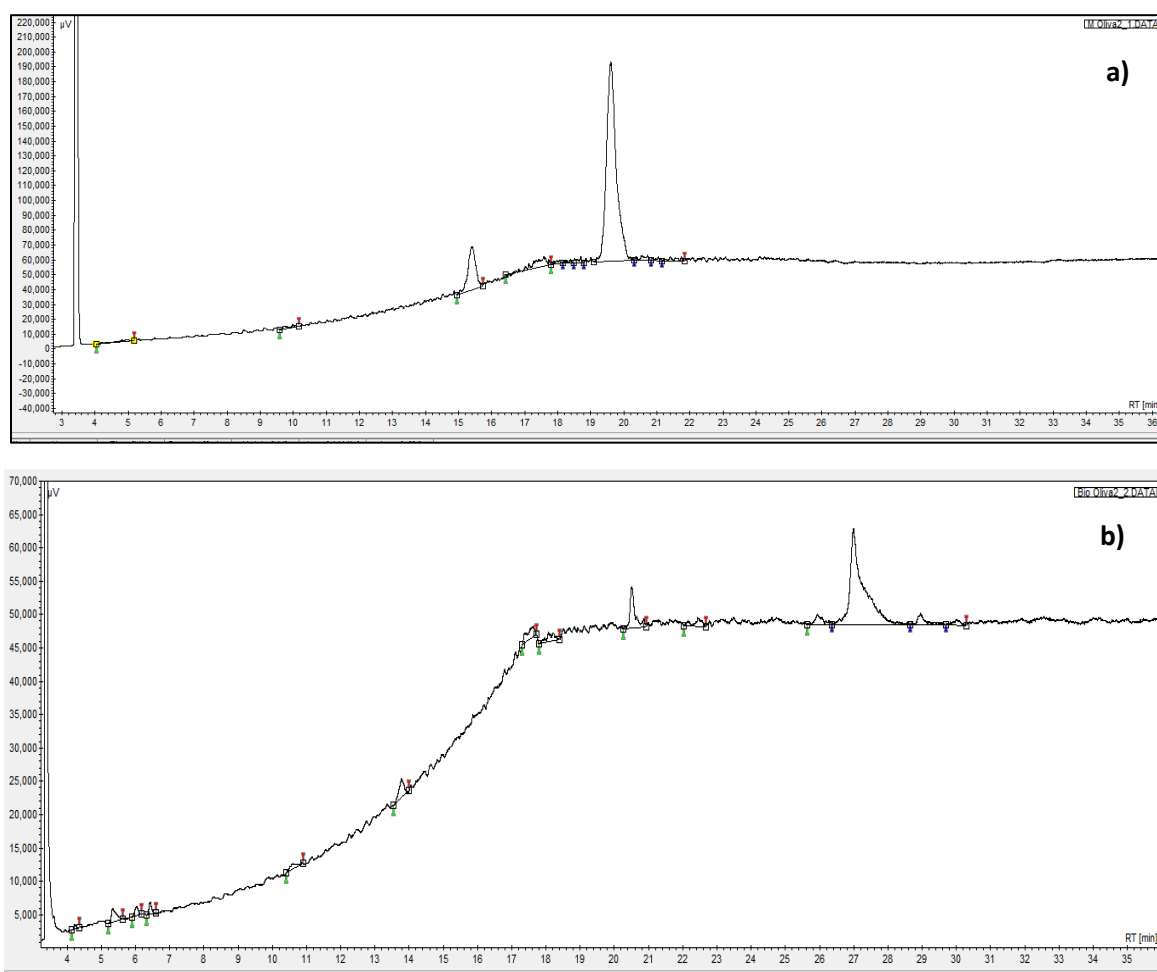

**Figure S1.** Chromatogram of a) Fatty acids profile of commercial olive oil, b) Biodiesel of commercial olive oil.

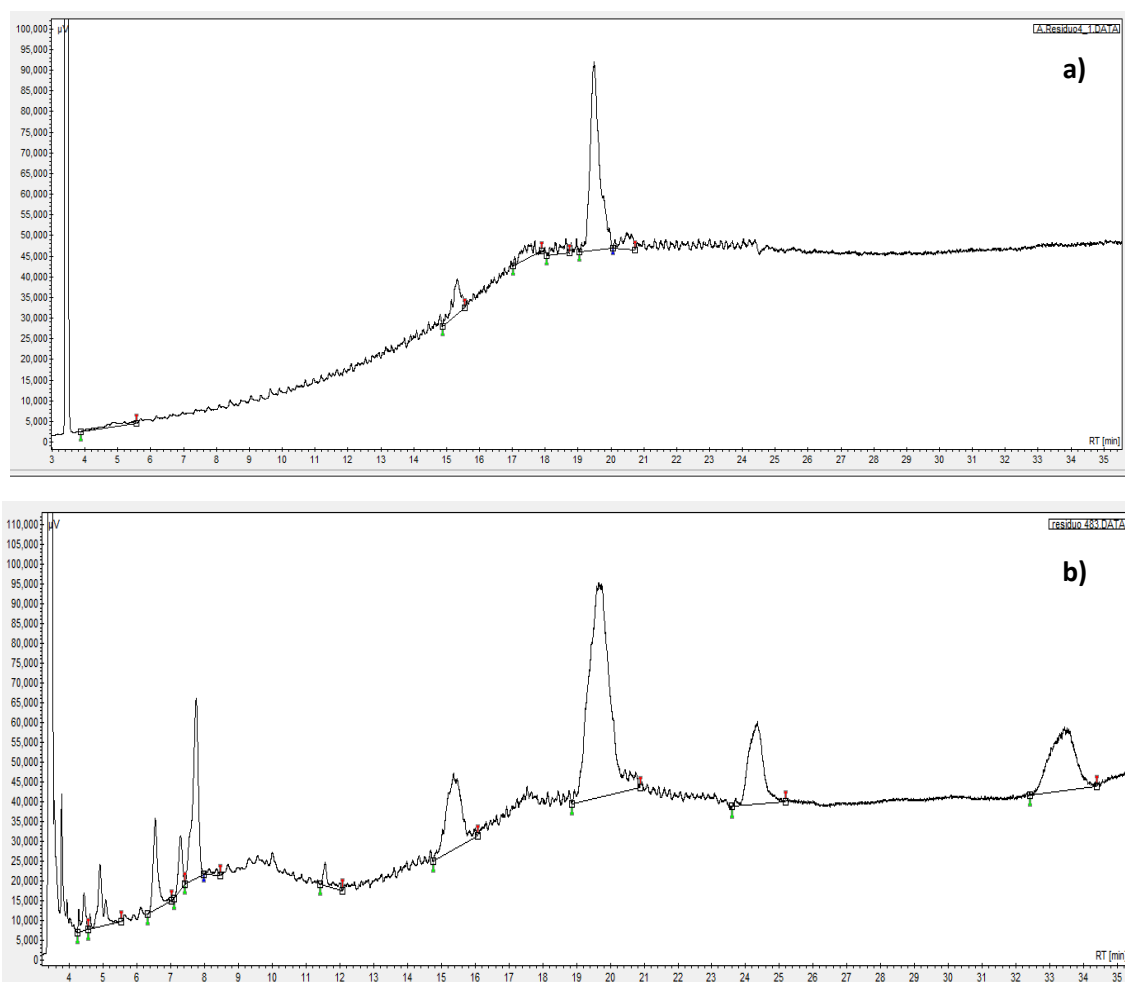

**Figure S2.** Chromatogram of a) Fatty acids profile of waste cooking oil, b) Biodiesel of waste cooking oil.

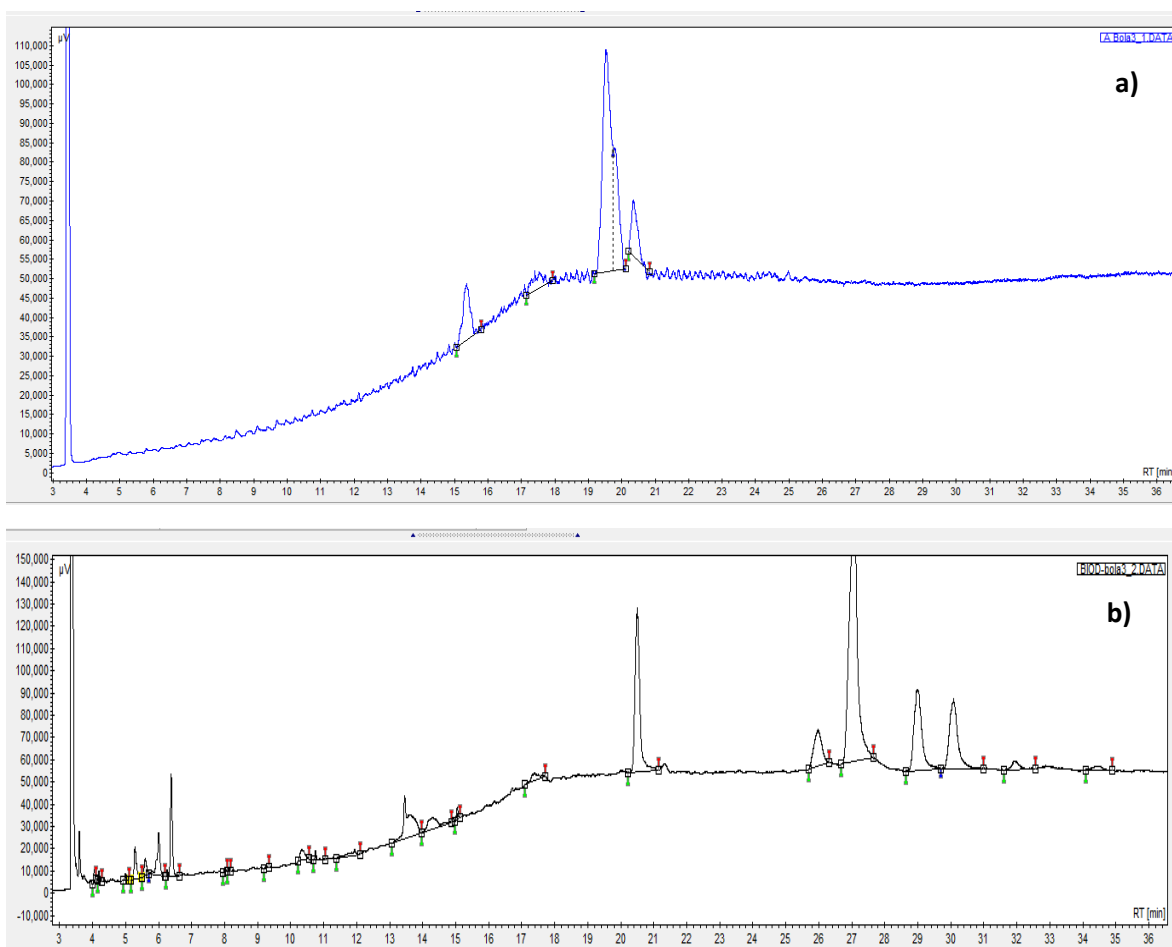

**Figure S3.** Chromatogram of a) Fatty acids profile of *Leonotis Nepetifolia* oil, b) Biodiesel of *Leonotis Nepetifolia* oil.
